# Supplementary material for: Synthesis, properties and catalytic performance of the novel, pseudo-spinel, multicomponent transition-metal selenides
Source: Royal Society of Chemistry journal article supplement (doi:10.1039/d2ta09401k), 2023-01-01
Supplement: d2ta09401k1.pdf [file d2ta09401k1.pdf]

SI Table 1 Chemical composition of  $\text{CoFeNiSe}_4$  powder and sintered pellet obtained from ICP-OES and XRF measurements (\*XRF data consist also indicate a relatively high content of oxygen absorbed on the material's surfaces during milling and mixing with a binder. Residual amounts of Si, Al, Mg, Cl, and S were also recorded).

| Method/Sample  | Co                    | Fe                    | Ni                    | Se                    | Composition                                          |
|----------------|-----------------------|-----------------------|-----------------------|-----------------------|------------------------------------------------------|
|                | [mg/dm <sup>3</sup> ] | [mg/dm <sup>3</sup> ] | [mg/dm <sup>3</sup> ] | [mg/dm <sup>3</sup> ] |                                                      |
| ICP-EOS/powder | 327.1                 | 324.2                 | 320.9                 | 1813                  | $\text{Co}_{0.96}\text{FeNi}_{0.94}\text{Se}_{3.96}$ |
| ICP-EOS/pellet | 292.4                 | 276.8                 | 302.2                 | 1630                  | $\text{CoFeNi}_{1.04}\text{Se}_{4.16}$               |
|                | %                     | %                     | %                     | %                     |                                                      |
| XRF/powder*    | 8.495                 | 8.430                 | 9.065                 | 45.456                | $\text{Co}_{0.96}\text{FeNi}_{1.02}\text{Se}_{3.82}$ |
| XRF/pellet*    | 8.177                 | 8.048                 | 8.958                 | 45.919                | $\text{Co}_{0.96}\text{FeNi}_{1.06}\text{Se}_{4.04}$ |

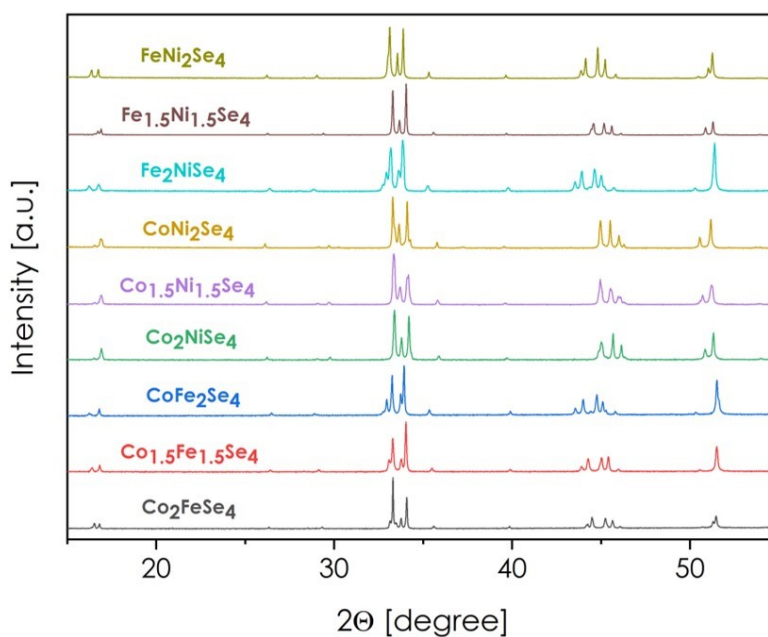

SI.Fig. 1 XRD patterns of ternary  $(\text{Co,Fe,Ni})_3\text{Se}_4$  systems indicating single-phase  $C2/m$  monoclinic structure (ref. 98-062-2978).

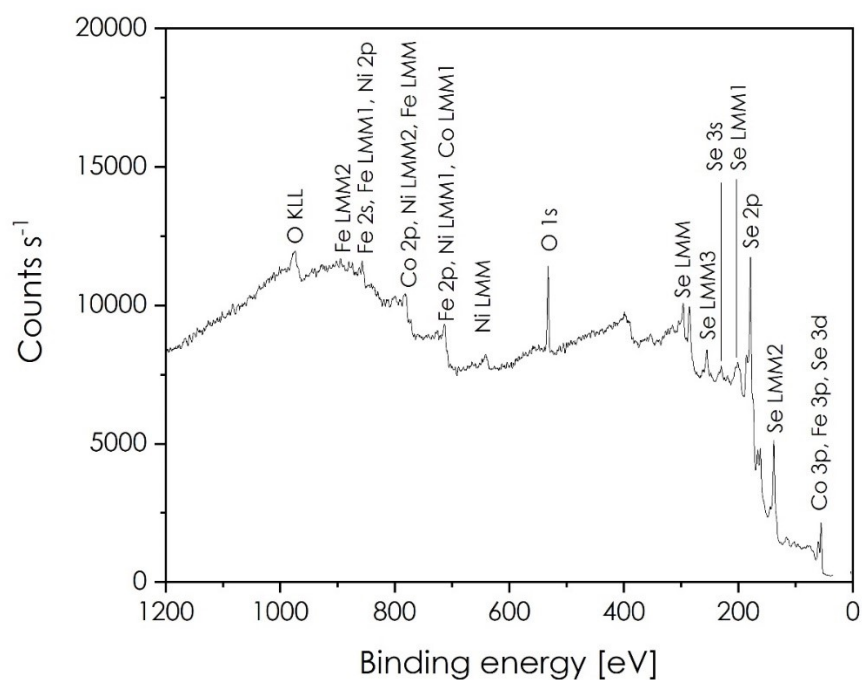

SI.Fig. 2 XPS survey spectrum of  $(\text{Co,Fe,Ni})_3\text{Se}_4$  sample.

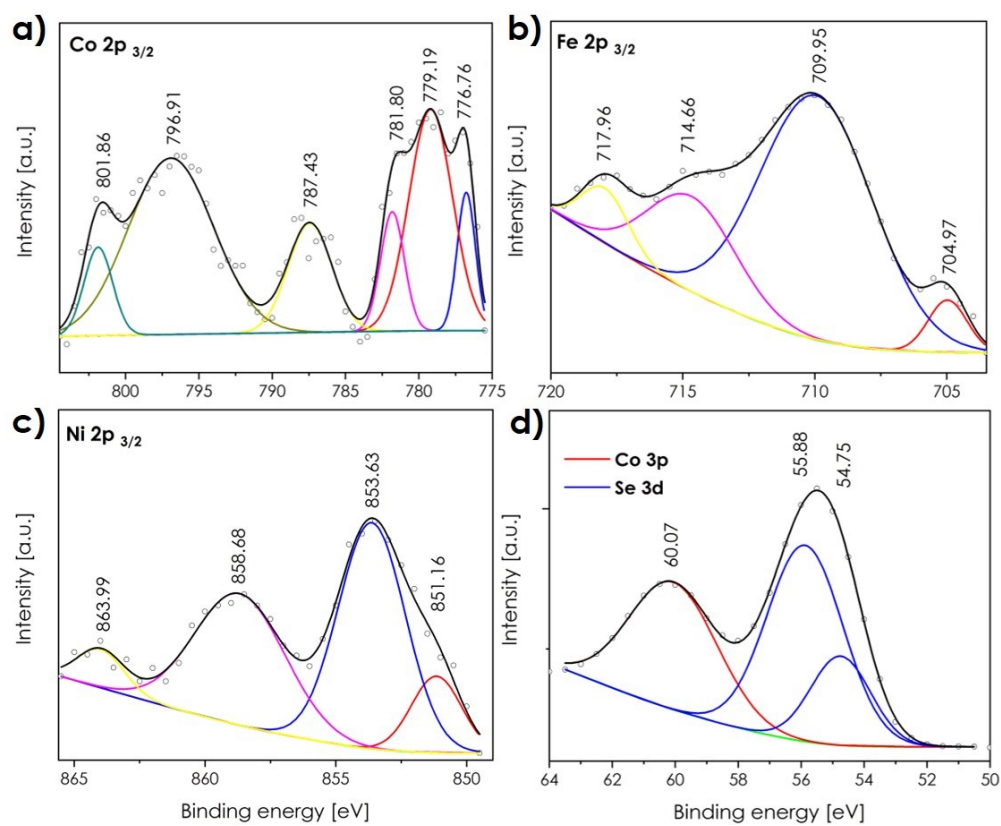

SI.Fig. 3 XPS data of  $(\text{Co,Fe,Ni})_3\text{Se}_4$ : a) Co 2p, b) Fe 2p, c) Ni 2p, d) combined Co 3p and Se 3d deconvoluted core level spectra.

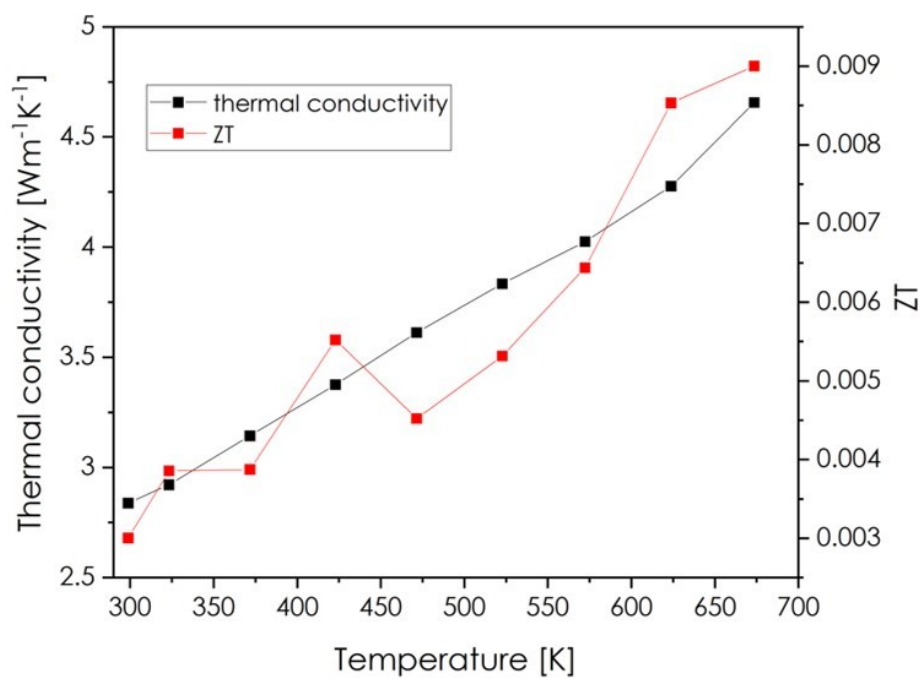

SI.Fig. 4 Total thermal conductivity and thermoelectric figure-of-merit as a function of temperature for  $(\text{Co,Fe,Ni})_3\text{Se}_4$  sample.

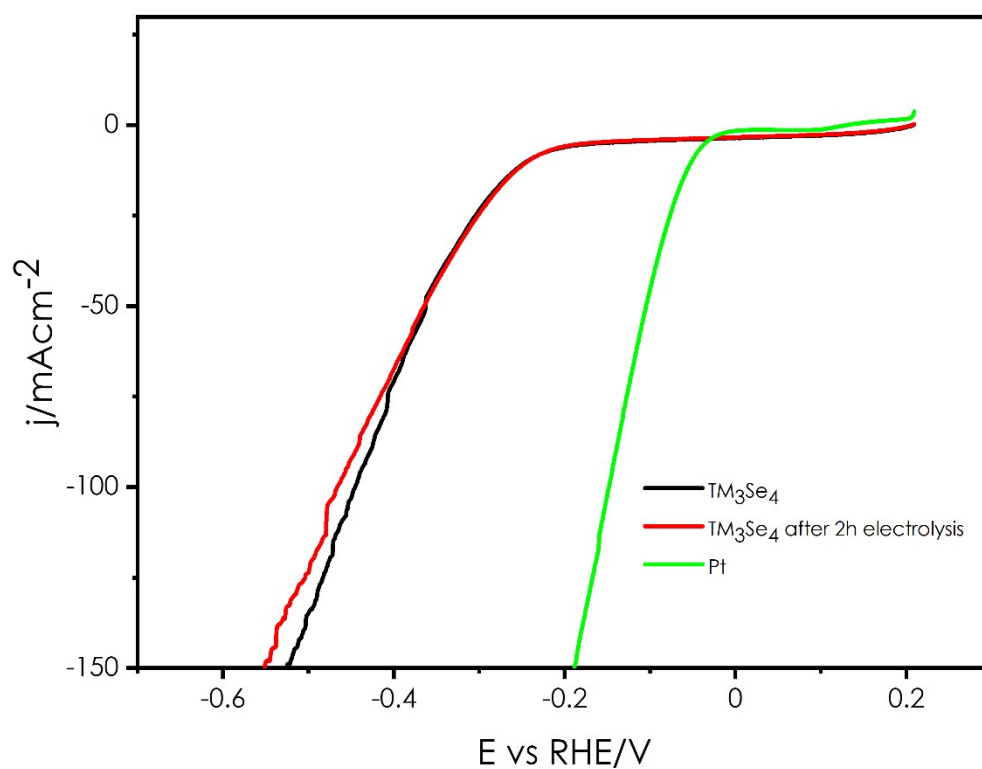

SI.Fig. 5 LSV curves normalized to geometric area recorded at sweep rate  $6.25 \text{ mVs}^{-1}$  at  $0.5 \text{ M H}_2\text{SO}_4$

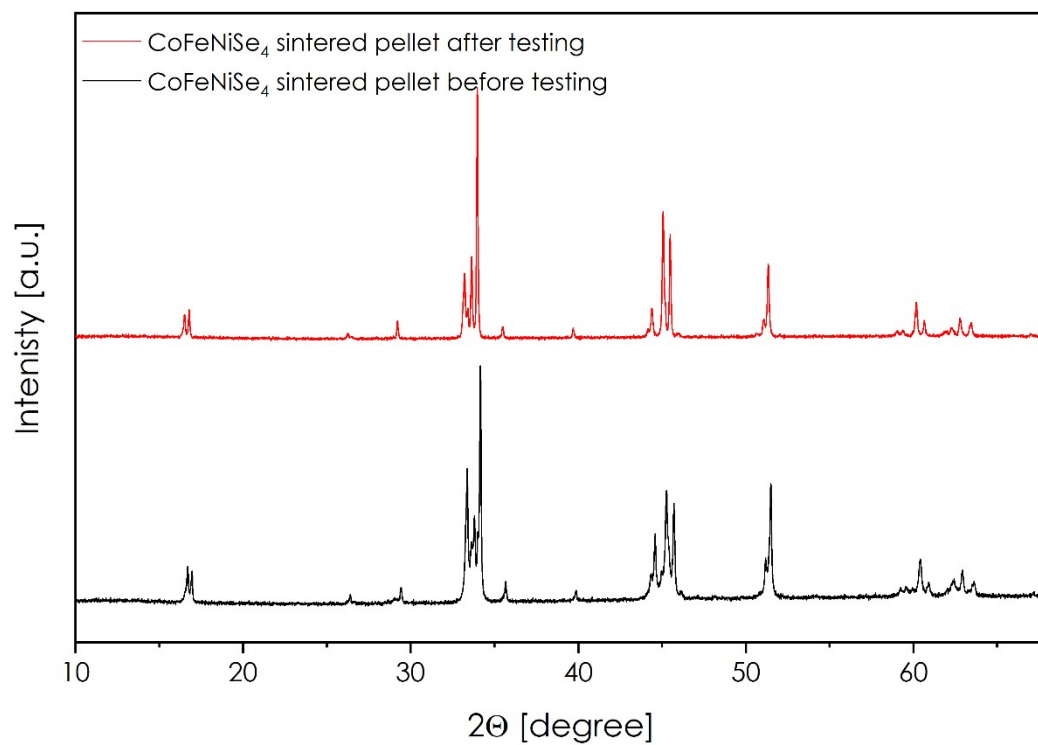

*SI.Fig. 6 XRD patterns for  $\text{CoFeNiSe}_4$  sintered sample before (bottom) and after (top) electrochemical testing.*
